# Supplementary material for: A visual–omics foundation model to bridge histopathology with spatial transcriptomics
Source: Nat Methods. Author manuscript; Available in PMC 2025 Jul 25. (PMC12240810; doi:10.1038/s41592-025-02707-1)
Supplement: Supplementary Tables 1–4. [file NIHMS2092004-supplement-Supplementary_Tables_1_4_.xlsx]

## Sheet: Supplementary_Table_1
Title	doi	Download link	Dataset name (if needed to specify)
Spatial multi-omic map of human myocardial infraction	https://doi.org/10.1038/s41586-022-05060-x	https://cellxgene.cziscience.com/collections/8191c283-0816-424b-9b61-c3e1d6258a77
Spatial multiomics map of trophoblast development in early pregnancy	https://doi.org/10.1038/s41586-023-05869-0	https://cellxgene.cziscience.com/collections/e2c257e7-6f79-487c-b81c-39451cd4ab3c
Spatially resolved multiomics of human cardiac niches	https://doi.org/10.1038/s41586-023-06311-1	https://www.heartcellatlas.org/
Transcriptome-scale spatial gene expression in the human dorsolateral prefrontal cortex	https://doi.org/10.1038/s41593-020-00787-0	https://gene.ai.tencent.com/SpatialOmics/dataset?datasetID=6
Spatiotemporal analysis of human intestinal development at single-cell resolution	https://doi.org/10.1016/j.cell.2020.12.016	https://spatial.rhesusbase.com/datasets/dataPage/STW-H-Colon-Visium-1
		https://spatial.rhesusbase.com/datasets/dataPage/STW-H-Colon-Visium-2
		https://spatial.rhesusbase.com/datasets/dataPage/STW-H-Colon-Visium-3
Spatial mapping reveals human adipocyte subpopulations with distinct sensitivities to insulin	https://doi.org/10.1016/j.cmet.2021.07.01	https://gene.ai.tencent.com/SpatialOmics/dataset?datasetID=12
Genome-wide spatial expression profiling in formalin-fixed tissues	https://doi.org/10.1016/j.xgen.2021.100065	https://gene.ai.tencent.com/SpatialOmics/dataset?datasetID=27
		https://gene.ai.tencent.com/SpatialOmics/dataset?datasetID=27
		https://gene.ai.tencent.com/SpatialOmics/dataset?datasetID=27
		https://gene.ai.tencent.com/SpatialOmics/dataset?datasetID=27
Super-resolved spatial transcriptomics by deep data fusion	https://doi.org/10.1038/s41587-021-01075-3	https://gene.ai.tencent.com/SpatialOmics/dataset?datasetID=28
Mapping the temporal and spatial dynamics of the human endometrium in vivo and in vitro	https://doi.org/10.1038/s41588-021-00972-2	https://gene.ai.tencent.com/SpatialOmics/dataset?datasetID=97
Human distal lung maps and lineage hierarchies reveal a bipotent progenitor	https://doi.org/10.1038/s41586-022-04541-3	https://gene.ai.tencent.com/SpatialOmics/dataset?datasetID=98
An N-Cadherin 2 expressing epithelial cell subpopulation predicts response to surgery, chemotherapy and immunotherapy in bladder cancer	https://doi.org/10.1038/s41467-021-25103-7	https://gene.ai.tencent.com/SpatialOmics/dataset?datasetID=102
Cancer cell states recur across tumor types and form specific interactions with the tumor microenvironment	https://doi.org/10.1038/s41588-022-01141-9	https://gene.ai.tencent.com/SpatialOmics/dataset?datasetID=118
Pan-cancer T cell atlas links a cellular stress response state to immunotherapy resistance	https://doi.org/10.1038/s41591-023-02371-y	https://www.ncbi.nlm.nih.gov/geo/query/acc.cgi?acc=GSE175540
Spatially resolved transcriptomic profiling of degraded and challenging fresh frozen samples	https://doi.org/10.1038/s41467-023-36071-5	https://data.mendeley.com/datasets/4w6krnywhn/1
Localization of T cell clonotypes using the Visium spatial transcriptomics platform	https://doi.org/10.1016/j.xpro.2022.101391	https://www.ncbi.nlm.nih.gov/geo/query/acc.cgi?acc=GSE179572
A spatially anchored transcriptomic atlas of the human kidney papilla identifies significant immune injury in patients with stone disease	https://doi.org/10.1038/s41467-023-38975-8	https://www.ncbi.nlm.nih.gov/geo/query/acc.cgi?acc=GSE231630
No publication		https://www.10xgenomics.com/resources/datasets/visium-cytassist-gene-and-protein-expression-library-of-human-tonsil-with-add-on-antibodies-h-e-6-5-mm-ffpe-2-standard
No publication		https://www.10xgenomics.com/resources/datasets/gene-protein-expression-library-of-human-tonsil-cytassist-ffpe-2-standard
No publication		https://www.10xgenomics.com/resources/datasets/human-brain-cancer-11-mm-capture-area-ffpe-2-standard
No publication		https://www.10xgenomics.com/resources/datasets/human-colorectal-cancer-11-mm-capture-area-ffpe-2-standard
No publication		https://www.10xgenomics.com/resources/datasets/human-lung-cancer-ffpe-2-standard
No publication		https://www.10xgenomics.com/resources/datasets/human-cerebellum-targeted-neuroscience-panel-1-standard
No publication		https://www.10xgenomics.com/resources/datasets/human-breast-cancer-visium-fresh-frozen-whole-transcriptome-1-standard
No publication		https://www.10xgenomics.com/resources/datasets/human-ovarian-cancer-1-standard
No publication		https://www.10xgenomics.com/resources/datasets/human-cervical-cancer-1-standard
No publication		https://www.10xgenomics.com/resources/datasets/human-intestine-cancer-1-standard
No publication		https://www.10xgenomics.com/resources/datasets/human-prostate-cancer-acinar-cell-carcinoma-ffpe-1-standard
No publication		https://www.10xgenomics.com/resources/datasets/normal-human-prostate-ffpe-1-standard-1-3-0
No publication		https://www.10xgenomics.com/resources/datasets/human-prostate-cancer-adenocarcinoma-with-invasive-carcinoma-ffpe-1-standard-1-3-0
No publication		https://www.10xgenomics.com/resources/datasets/human-breast-cancer-ductal-carcinoma-in-situ-invasive-carcinoma-ffpe-1-standard-1-3-0
No publication		https://www.10xgenomics.com/resources/datasets/human-glioblastoma-whole-transcriptome-analysis-1-standard-1-2-0
No publication		https://www.10xgenomics.com/resources/datasets/human-colorectal-cancer-whole-transcriptome-analysis-1-standard-1-2-0
No publication		https://www.10xgenomics.com/resources/datasets/human-breast-cancer-whole-transcriptome-analysis-1-standard-1-2-0
No publication		https://www.10xgenomics.com/resources/datasets/human-breast-cancer-block-a-section-2-1-standard-1-1-0
No publication		https://www.10xgenomics.com/resources/datasets/human-breast-cancer-block-a-section-1-1-standard-1-1-0
Mapping human haematopoietic stem cells from haemogenic endothelium to birth	https://doi.org/10.1038/s41586-022-04571-x	https://ngdc.cncb.ac.cn/crost/download	VISDP000019
Integration of spatial transcriptomic and single cell sequencing identifies expression patterns underlying immune and epithelial cell cross-talk in acute kidney injury	https://doi.org/10.1172/jci.insight.147703	https://spatial.rhesusbase.com/datasets/dataPage/STW-H-Kidney-Visium-1
Integrating Spatial Transcriptomics and Single-Cell RNA-seq Reveals the Gene Expression Profling of the Human Embryonic Liver	https://doi.org/10.3389/fcell.2021.652408	https://spatial.rhesusbase.com/datasets/dataPage/STW-H-Liver-Visium-1
		https://spatial.rhesusbase.com/datasets/dataPage/STW-H-Liver-Visium-2
		https://spatial.rhesusbase.com/datasets/dataPage/STW-H-Liver-Visium-3
Single-Cell, Single-Nucleus, and Spatial RNA Sequencing of the Human Liver Identifies Cholangiocyte and Mesenchymal Heterogeneity	https://doi.org/10.1002/hep4.1854	https://spatial.rhesusbase.com/datasets/dataPage/STW-H-Liver-Visium-3
Spatial proteogenomics reveals distinct and evolutionarily conserved hepatic macrophage niches	https://doi.org/10.1016/j.cell.2021.12.018	https://spatial.rhesusbase.com/datasets/dataPage/STW-H-Liver-Visium-4
		https://spatial.rhesusbase.com/datasets/dataPage/STW-H-Liver-Visium-5
Multimodal Analysis of Composition and Spatial Architecture in Human Squamous Cell Carcinoma	https://doi.org/10.1016/j.cell.2020.05.039	https://spatial.rhesusbase.com/datasets/dataPage/STW-H-Skin-Visium-1
Spatial transcriptomics combined with single-cell RNA-sequencing unravels the complex inflammatory cell network in atopic dermatitis	https://doi.org/10.1111/all.15781	https://www.ncbi.nlm.nih.gov/geo/query/acc.cgi?acc=GSE197023
Spatial resolution of cellular senescence dynamics in colorectal liver metastasis	https://doi.org/10.1111/acel.13853	https://www.ncbi.nlm.nih.gov/geo/query/acc.cgi?acc=GSE206552
Profiling spatiotemporal gene expression of the developing human spinal cord and implications for ependymoma origin	https://doi.org/10.1038/s41593-023-01312-9	https://www.ncbi.nlm.nih.gov/geo/query/acc.cgi?acc=GSE219122
Identification and characterization of a proliferative cell population in estrogen receptor-positive metastatic breast cancer through spatial and single-cell transcriptomics	https://doi.org/10.1101/2023.01.31.526403	https://www.ncbi.nlm.nih.gov/geo/query/acc.cgi?acc=GSE214571
A spatially resolved single-cell genomic atlas of the adult human breast	https://doi.org/10.1038/s41586-023-06252-9	https://cellxgene.cziscience.com/collections/4195ab4c-20bd-4cd3-8b3d-65601277e731
Comprehensive analysis of spatial architecture in primary liver cancer	https://doi.org/10.1126/sciadv.abg3750	http://lifeome.net/supp/livercancer-st/data.htm
Mapping single-cell transcriptomes in the intra-tumoral and associated territories of kidney cancer	https://doi.org/10.1016/j.ccell.2022.11.001	https://cellxgene.cziscience.com/collections/f7cecffa-00b4-4560-a29a-8ad626b8ee08
Spatial Transcriptomic Analysis of a Diverse Patient Cohort Reveals a Conserved Architecture in Triple-Negative Breast Cancer	https://doi.org/10.1158/0008-5472.CAN-22-2682	https://soar.fsm.northwestern.edu/#databrowser	Bassiouni_2023
Spatially resolved transcriptomics reveals pro-inflammatory fibroblast involved in lymphocyte recruitment through CXCL8 and CXCL10	https://doi.org/10.7554/eLife.81525	https://soar.fsm.northwestern.edu/#databrowser	Caetano_2023_oral_mucosa
Snail-regulated exosomal microRNA-21 suppresses NLRP3 inflammasome activity to enhance cisplatin resistance	https://doi.org/10.1136/jitc-2022-004832	https://soar.fsm.northwestern.edu/#databrowser	Cheng_2022_oral_epithelia
Spatial transcriptomics reveals discrete tumour microenvironments and autocrine loops within ovarian cancer subclones	https://doi.org/10.1038/s41467-024-47271-y	https://www.ncbi.nlm.nih.gov/geo/query/acc.cgi?acc=GSE211956
Spatial transcriptomic analysis delineates epithelial and mesenchymal subpopulations and transition stages in childhood ependymoma	https://doi.org/10.1093/neuonc/noac219	https://soar.fsm.northwestern.edu/#databrowser	Fu_2022_ependymoma
Multimodal human thymic profiling reveals trajectories and cellular milieu for T agonist selection	https://doi.org/10.3389/fimmu.2022.1092028	https://soar.fsm.northwestern.edu/#databrowser	Heimli_2022_thymus
Intratumor heterogeneity and T cell exhaustion in primary CNS lymphoma	https://doi.org/10.1186/s13073-022-01110-1	https://soar.fsm.northwestern.edu/#databrowser	Heming_2022_brain
5-Alpha reductase inhibitors induce a prostate luminal to club cell transition in human benign prostatic hyperplasia	https://doi.org/10.1002/path.5857	https://soar.fsm.northwestern.edu/#databrowser	Joseph_2022_human_BPH
An atlas of healthy and injured cell states and niches in the human kidney	https://doi.org/10.1038/s41586-023-05769-3	https://soar.fsm.northwestern.edu/#databrowser	Lake_2023_Visium_kidney
Single cell profiling of primary and paired metastatic lymph node tumors in breast cancer patients	https://doi.org/10.1038/s41586-023-05769-3	https://soar.fsm.northwestern.edu/#databrowser	Liu_2022_human_lymph_node_metastasis
The cellular architecture of the antimicrobial response network in human leprosy granulomas	https://doi.org/10.1038/s41590-021-00956-8	https://soar.fsm.northwestern.edu/#databrowser	Ma_2021_skin_leprosy
		https://soar.fsm.northwestern.edu/#databrowser	Ma_2021_skin_reversal
		https://soar.fsm.northwestern.edu/#databrowser	Ma_2021_skin_tuberculoid
Assessment of spatial transcriptomics for oncology discovery	https://doi.org/doi: 10.1016/j.crmeth.2022.100340	https://soar.fsm.northwestern.edu/#databrowser	Rabe_2022_pancreas
Spatial transcriptomics reveals niche-specific enrichment and vulnerabilities of radial glial stem-like cells in malignant gliomas	https://doi.org/10.1038/s41467-023-36707-6	https://soar.fsm.northwestern.edu/#databrowser	Ren_2023_DMG
		https://soar.fsm.northwestern.edu/#databrowser	Ren_2023_GBM
Spatial transcriptomics landscape of lesions from non-communicable inflammatory skin diseases	https://doi.org/10.1038/s41467-022-35319-w	https://www.ncbi.nlm.nih.gov/geo/query/acc.cgi?acc=GSE206391
A cellular taxonomy of the adult human spinal cord	https://doi.org/10.1016/j.neuron.2023.01.007	https://soar.fsm.northwestern.edu/#databrowser	Yadav_2023_spinal_cord
Mapping the developing human immune system across organs	https://doi.org/10.1126/science.abo0510	https://developmental.cellatlas.io/fetal-immune#DatasetModalSpatial1
		https://developmental.cellatlas.io/fetal-immune#DatasetModalSpatial2
		https://developmental.cellatlas.io/fetal-immune#DatasetModalSpatial3
Spatially Resolved Transcriptomes of Mammalian Kidneys Illustrate the Molecular Complexity and Interactions of Functional Nephron Segments	https://doi.org/10.3389/fmed.2022.873923	https://ngdc.cncb.ac.cn/crost/download	VISDP000007
Vitamin D sufficiency enhances differentiation of patient-derived prostate epithelial organoids	https://doi.org/10.1016/j.isci.2020.101974	https://ngdc.cncb.ac.cn/crost/download	VISDP000015
Integration of spatial and single-cell transcriptomics localizes epithelial cell–immune cross-talk in kidney injury	https://doi.org/10.1172/jci.insight.147703	https://ngdc.cncb.ac.cn/crost/download	VISDP000029
Distinct phenotypic states and spatial distribution of CD8+ T cell clonotypes in human brain metastases	https://doi.org/10.1016/j.xcrm.2022.100620	https://ngdc.cncb.ac.cn/crost/download	VISDP000040
Integrated Analysis of Single-Cell and Spatial Transcriptomics in Keloids: Highlights on Fibrovascular Interactions in Keloid Pathogenesis	https://doi.org/10.1016/j.jid.2022.01.017	https://ngdc.cncb.ac.cn/crost/download	VISDP000044
Dietary palmitic acid promotes a prometastatic memory via Schwann cells	https://doi.org/10.1038/s41586-021-04075-0	https://ngdc.cncb.ac.cn/crost/download	VISDP000048
Spatially resolved transcriptomics of high-grade serous ovarian carcinoma	https://doi.org/10.1016/j.isci.2022.103923	https://ngdc.cncb.ac.cn/crost/download	VISDP000062
Spatial transcriptomics stratifies psoriatic disease severity by emergent cellular ecosystems	https://doi.org/10.1126/sciimmunol.abq7991	https://ngdc.cncb.ac.cn/crost/download	VISDP000075
Single-cell RNA transcriptome analysis of CNS immune cells reveals CXCL16/CXCR6 as maintenance factors for tissue-resident T cells that drive synapse elimination	https://doi.org/10.1186/s13073-022-01111-0	https://ngdc.cncb.ac.cn/crost/download	VISDP000077
Spatiotemporally deciphering the mysterious mechanism of persistent HPV-induced malignant transition and immune remodelling from HPV-infected normal cervix, precancer to cervical cancer: Integrating single-cell RNA-sequencing and spatial transcriptome	https://doi.org/10.1002/ctm2.1219	https://ngdc.cncb.ac.cn/crost/download	VISDP000144
Multimodal decoding of human liver regeneration	https://doi.org/10.1038/s41586-024-07376-2	https://ngdc.cncb.ac.cn/crost/download	VISDP000151
Comparison of the Illumina NextSeq 2000 and GeneMind Genolab M sequencing platforms for spatial transcriptomics	https://doi.org/10.1186/s12864-023-09192-w	https://ngdc.cncb.ac.cn/crost/download	VISDP000153
Lineage-specific regulatory changes in hypertrophic cardiomyopathy unraveled by single-nucleus RNA-seq and spatial transcriptomics	https://doi.org/10.1038/s41421-022-00490-3	https://ngdc.cncb.ac.cn/crost/download	VISDP000155
Charting the Heterogeneity of Colorectal Cancer Consensus Molecular Subtypes using Spatial Transcriptomics	https://doi.org/10.1101/2023.01.23.525135	https://ngdc.cncb.ac.cn/crost/download	VISDP000156
A topographic atlas defines developmental origins of cell heterogeneity in the human embryonic lung	https://doi.org/10.1038/s41556-022-01064-x	https://www.ncbi.nlm.nih.gov/geo/query/acc.cgi?acc=GSE215897
Single-cell and spatial transcriptome analysis reveals the cellular heterogeneity of liver metastatic colorectal cancer	https://doi.org/10.1126/sciadv.adf5464	https://www.ncbi.nlm.nih.gov/geo/query/acc.cgi?acc=GSE225857
Sarcoma microenvironment cell states and ecosystems are associated with prognosis and predict response to immunotherapy	https://doi.org/10.1038/s43018-024-00743-y	https://www.ncbi.nlm.nih.gov/geo/query/acc.cgi?acc=GSE212526
Spatial multimodal analysis of transcriptomes and metabolomes in tissues	https://doi.org/10.1038/s41587-023-01937-y	https://www.ncbi.nlm.nih.gov/geo/query/acc.cgi?acc=GSE232910
Cellular heterogeneity of pluripotent stem cell-derived cardiomyocyte grafts is mechanistically linked to treatable arrhythmias	https://doi.org/10.1038/s44161-023-00419-3	https://www.ncbi.nlm.nih.gov/geo/query/acc.cgi?acc=GSE248949
Siglec-9 acts as an immune-checkpoint molecule on macrophages in glioblastoma, restricting T-cell priming and immunotherapy response	https://doi.org/10.1038/s43018-023-00598-9	https://www.ncbi.nlm.nih.gov/geo/query/acc.cgi?acc=GSE235672
Single-cell and spatial transcriptomics of the infarcted heart define the dynamic onset of the border zone in response to mechanical destabilization	https://doi.org/10.1038/s44161-022-00160-3	https://www.ncbi.nlm.nih.gov/geo/query/acc.cgi?acc=GSE214611
Multiscale spatial mapping of cell populations across anatomical sites in healthy human skin and basal cell carcinoma	https://doi.org/10.1073/pnas.2313326120	https://spatial-skin-atlas.cellgeni.sanger.ac.uk/
Niche-DE: niche differential gene expression analysis in spatial transcriptomics data identifies context-dependent cell-cell interactions	https://doi.org/10.1186/s13059-023-03159-6	https://figshare.com/articles/dataset/Patient_5_Raw_Data/24803616,https://figshare.com/articles/dataset/Patient_4_Raw_Data/24803571
A human fetal lung cell atlas uncovers proximal-distal gradients of differentiation and key regulators of epithelial fates	https://doi.org/10.1016/j.cell.2022.11.00	https://explore.data.humancellatlas.org/projects/2fe3c60b-ac1a-4c61-9b59-f6556c0fce63
Effect of aging on the human myometrium at single-cell resolution	https://doi.org/10.1038/s41467-024-45143-z	https://www.ncbi.nlm.nih.gov/geo/query/acc.cgi?acc=GSE236660
Integrative analysis of spatial and single-cell transcriptome data from human pancreatic cancer reveals an intermediate cancer cell population associated with poor prognosis	https://doi.org/10.1186/s13073-024-01287-7	https://www.ncbi.nlm.nih.gov/geo/query/acc.cgi?acc=GSE235315
No publication	https://www.ncbi.nlm.nih.gov/geo/query/acc.cgi?acc=GSE226533	https://www.ncbi.nlm.nih.gov/geo/query/acc.cgi?acc=GSE226533
Integrative spatial analysis reveals a multi-layered organization of glioblastoma	https://doi.org/10.1016/j.cell.2024.03.029	https://www.ncbi.nlm.nih.gov/geo/query/acc.cgi?acc=GSE237183
Starfysh reveals heterogeneous spatial dynamics in the breast tumor microenvironment	https://doi.org/10.1101/2022.11.21.517420	https://www.ncbi.nlm.nih.gov/geo/query/acc.cgi?acc=GSE218951
PanIN and CAF Transitions in Pancreatic Carcinogenesis Revealed with Spatial Data Integration	https://doi.org/10.1016/j.cels.2024.07.001	https://www.ncbi.nlm.nih.gov/geo/query/acc.cgi?acc=GSE254829
No publication	https://www.ncbi.nlm.nih.gov/geo/query/acc.cgi?acc=GSE245908	https://www.ncbi.nlm.nih.gov/geo/query/acc.cgi?acc=GSE226533
High-resolution analysis of mononuclear phagocytes reveals clinically relevant markers in human colo-rectal liver metastasis	https://doi.org/10.1158/2326-6066.CIR-22-0462	https://www.ncbi.nlm.nih.gov/geo/query/acc.cgi?acc=GSE254364
Identification of an anaplastic subtype of prostate cancer amenable to therapies targeting SP1 or translation elongation	https://doi.org/10.1126/sciadv.adm7098	https://www.ncbi.nlm.nih.gov/geo/query/acc.cgi?acc=GSE245388
Single-cell and spatial transcriptomics characterisation of the immunological landscape in the healthy and PSC human liver	https://doi.org/10.1016/j.jhep.2023.12.023	https://www.ncbi.nlm.nih.gov/geo/query/acc.cgi?acc=GSE243981
Molecular reframing of fibroblasts during resolution of arthritis	https://doi.org/10.21203/rs.3.rs-2668533/v1	https://www.ncbi.nlm.nih.gov/geo/query/acc.cgi?acc=GSE228972
No publication	https://www.ncbi.nlm.nih.gov/geo/query/acc.cgi?acc=GSE251950	https://www.ncbi.nlm.nih.gov/geo/query/acc.cgi?acc=GSE226533
Tertiary lymphoid structures sustain cutaneous B cell activity in hidradenitis suppurativa	https://doi.org/10.1172/jci.insight.169870	https://www.ncbi.nlm.nih.gov/geo/query/acc.cgi?acc=GSE249729
Clonal Proliferation Within Smooth Muscle Cells in Unstable Human Atherosclerotic Lesions	https://doi.org/10.1161/ATVBAHA.123.319479	https://www.ncbi.nlm.nih.gov/geo/query/acc.cgi?acc=GSE243179
Spatial transcriptomics reveal signatures of histopathological changes in muscular sarcoidosis	https://doi.org/10.3390/cells12232747	https://www.ncbi.nlm.nih.gov/geo/query/acc.cgi?acc=GSE243291
Common Mitochondrial Deletions in RNA-Seq: Evaluation of Bulk, Single-Cell and Spatial Transcriptomic Datasets	https://doi.org/10.1038/s42003-024-05877-4	https://www.ncbi.nlm.nih.gov/geo/query/acc.cgi?acc=GSE226663
Spatial Transcriptomics Reveal Pitfalls and Opportunities for the Detection of Rare High-Plasticity Breast Cancer Subtypes	https://doi.org/10.1016/j.labinv.2023.100258	https://www.ncbi.nlm.nih.gov/geo/query/acc.cgi?acc=GSE213688
Integration of single-nuclei RNA-sequencing, spatial transcriptomics and histochemistry defines the complex microenvironment of NF1-associated plexiform neurofibromas	https://doi.org/10.1186/s40478-023-01639-1	https://www.ncbi.nlm.nih.gov/geo/query/acc.cgi?acc=GSE232766
Spatial transcriptomics reveals a low extent of transcriptionally active hepatitis B virus integration in patients with HBsAg loss	https://doi.org/10.1136/gutjnl-2023-330577	https://www.ncbi.nlm.nih.gov/geo/query/acc.cgi?acc=GSE243367
Spatial heterogeneity of integrins and their ligands in primary breast tumors	https://doi.org/10.24976/Discov.Med.202335178.86	https://www.ncbi.nlm.nih.gov/geo/query/acc.cgi?acc=GSE242311
A spatial multi-omics atlas of the human lung reveals a novel immune cell survival niche	https://doi.org/10.1101/2021.11.26.470108	https://5locationslung.cellgeni.sanger.ac.uk/
Spatial transcriptomic analysis of virtual prostate biopsy reveals confounding effect of tissue heterogeneity on genomic signatures	https://doi.org/10.1186/s12943-023-01863-2	https://data.mendeley.com/datasets/svw96g68dv/4
An atlas of cells in the human tonsil	https://doi.org/10.1016/j.immuni.2024.01.006	https://zenodo.org/records/10373041
Spatial transcriptomics of B cell and T cell receptors reveals lymphocyte clonal dynamics	https://doi.org/10.1126/science.adf8486	https://zenodo.org/records/7961605

## Sheet: Supplementary_Table_2
Tissue	Cell type
breast 1/breast 2	B cell
breast 1/breast 2	adipocyte of breast
breast 1/breast 2	endothelial cell of lymphatic vessel
breast 1/breast 2	endothelial cell of vascular tree
breast 1/breast 2	fibroblast
breast 1/breast 2	luminal epithelial cell of mammary gland
breast 1/breast 2	mammary gland epithelial cell
breast 1/breast 2	pericyte
healthy heart	AV bundle
healthy heart	adipose tissue
healthy heart	cardiac skeleton
healthy heart	endocardium
healthy heart	epicardium subepicardium
healthy heart	fibrosis
healthy heart	haemorrhage
healthy heart	membraneous septum
healthy heart	myocardium
healthy heart	myocardium atrial
healthy heart	myocardium ventricular
healthy heart	nerve
healthy heart	node
healthy heart	other haemorrhage
healthy heart	purkinje cell
healthy heart	vessel
MI heart (control)	cardiomyocyte
MI heart (control)	cycling cells
MI heart (control)	endothelial
MI heart (control)	fibroblast
MI heart (control)	lymphoid
MI heart (control)	mast
MI heart (control)	myeloid
MI heart (control)	neuronal
MI heart (control)	vSMCs
MI heart (fibrotic zone/ischaemic zone/remote zone)	adipocyte
MI heart (fibrotic zone/ischaemic zone/remote zone)	cardiomyocyte
MI heart (fibrotic zone/ischaemic zone/remote zone)	cycling cells
MI heart (fibrotic zone/ischaemic zone/remote zone)	endothelial
MI heart (fibrotic zone/ischaemic zone/remote zone)	fibroblast
MI heart (fibrotic zone/ischaemic zone/remote zone)	lymphoid
MI heart (fibrotic zone/ischaemic zone/remote zone)	mast
MI heart (fibrotic zone/ischaemic zone/remote zone)	myeloid
MI heart (fibrotic zone/ischaemic zone/remote zone)	pericyte
MI heart (fibrotic zone/ischaemic zone/remote zone)	vSMCs
kidney cancer	CD8-positive alpha-beta T cell
kidney cancer	IgA plasma cell
kidney cancer	IgG plasma cell
kidney cancer	MHC-II-positive classical monocyte
kidney cancer	collagen secreting cell
kidney cancer	conventional dendritic cell
kidney cancer	endothelial cell
kidney cancer	epithelial cell of proximal tubule
kidney cancer	epithelial cell of proximal tubule segment 3
kidney cancer	fibroblast
kidney cancer	kidney loop of Henle thick ascending limb epithelial cell
kidney cancer	kidney pelvis urothelial cell
kidney cancer	macrophage
kidney cancer	naive thymus-derived CD4-positive alpha-beta T cell
kidney cancer	native cell
kidney cancer	pericyte
kidney cancer (interface)	B cell
kidney cancer (interface)	CD4-positive CD25-positive alpha-beta regulatory T cell
kidney cancer (interface)	CD4-positive alpha-beta T cell
kidney cancer (interface)	CD8-positive alpha-beta T cell
kidney cancer (interface)	IgA plasma cell
kidney cancer (interface)	IgG plasma cell
kidney cancer (interface)	MHC-II-positive classical monocyte
kidney cancer (interface)	activated type II NK T cell
kidney cancer (interface)	collagen secreting cell
kidney cancer (interface)	conventional dendritic cell
kidney cancer (interface)	endothelial cell
kidney cancer (interface)	endothelial cell of lymphatic vessel
kidney cancer (interface)	epithelial cell
kidney cancer (interface)	epithelial cell of proximal tubule
kidney cancer (interface)	epithelial cell of proximal tubule segment 1
kidney cancer (interface)	epithelial cell of proximal tubule segment 3
kidney cancer (interface)	fibroblast
kidney cancer (interface)	kidney collecting duct principal cell
kidney cancer (interface)	kidney connecting tubule principal cell
kidney cancer (interface)	kidney distal convoluted tubule epithelial cell
kidney cancer (interface)	kidney loop of Henle ascending limb epithelial cell
kidney cancer (interface)	kidney loop of Henle thick ascending limb epithelial cell
kidney cancer (interface)	kidney pelvis urothelial cell
kidney cancer (interface)	macrophage
kidney cancer (interface)	mast cell
kidney cancer (interface)	naive B cell
kidney cancer (interface)	naive thymus-derived CD4-positive alpha-beta T cell
kidney cancer (interface)	native cell
kidney cancer (interface)	natural killer cell
kidney cancer (interface)	non-classical monocyte
kidney cancer (interface)	pericyte
kidney cancer (interface)	podocyte
kidney cancer (interface)	renal alpha-intercalated cell
kidney cancer (interface)	renal beta-intercalated cell
lung 1	airway smooth muscle
lung 1	arterial vessel
lung 1	cartilage
lung 1	glands
lung 1	multilayer epithelium
lung 1	nerve
lung 1	parenchyma
lung 1	perichondrium
lung 1	weird morphology
lung 2	airway smooth muscle
lung 2	arterial vessel
lung 2	cartilage
lung 2	glands
lung 2	mesothelium
lung 2	multilayer epithelium
lung 2	nerve
lung 2	parenchyma
lung 2	pulmonary vessel
lung 2	small airway
lung 2	venous vessel
lung 3	airway smooth muscle
lung 3	arterial vessel
lung 3	cartilage
lung 3	glands
lung 3	large vessel
lung 3	mucous glands
lung 3	multilayer epithelium
lung 3	nerve bundle
lung 3	peribronchium
lung 3	perichondrium
lung 3	vessel

## Sheet: Supplementary_Table_3
	OmiCLIP	PLIP
CRC7K
Adipose	FABP4 ADIPOQ LEP ACSL1 APOE GPAM FABP1 CEBPA LIPE ADIPOR1 ADIPOR2	An H&E image patch of adipose tissue
Muscle	MYL6 MYL9 TPM2 TPM1 DES MYH11 COL3A1 CALD1 MYLK SMTN NPPA TNNT2 LMOD1 ACTA2 CNN1 MYOCD ACTA1 MYLK2	An H&E image patch of smooth muscle
Lymphocytes	TRBC2 IL2 IL2RA IL2RB IL4 TNF LAPTM5 TERF2IP ATF6 CD79A CD3D CD24 CD3E CD4 CD8A CD25 CD34 CD45 CD56 CD69	An H&E image patch of lymphocytes
Tumor	TP53 EPCAM KRAS EGFR DEFA5 DEFA6 CEACAM5 CEA KRT18 KRT8 KRT19 CDH17 CK20 MYO6 TP53BP2 PLA2G2A CLDN7 TJP1 PKP3 DSP	An H&E image patch of colorectal adenocarcinoma epithelium
normal colon mucosa	CDX2 SI LCT VIL1 FABP2 KRT20 SLC5A1 SLC26A3 SLC9A3 GSTA1 TFF3 CDH17 GUCY2C GUCA2A GUCA2B AQP8 GCG	An H&E image patch of normal colon mucosa
mucus	SPDEF SOX9 ELF3 KLF4 S100A11 MUC1 MUC2 VEGFA TGFBI ARG2 ARG1 SERPINE1 THBS1 EPHB2 NKD1 TFF1 ITLN1	An H&E image patch of mucus
cancer-associated stroma	FAP PDGFRB SDF4 SPARC POSTN GFAP LOX MMP2 MMP9 MMP14 COL1A1 CCL2 SPP1 LUM CTGF KRT7 VIM	An H&E image patch of cancer-associated stroma
debris	CASP3 CASP8 ANXA5 ELANE FAS NOTCH2 CYCS PEA15 CTSB CTSS CTSH PDCD4 PARP14 BAX CLDN1 LCP1 LAMP1 DNAJB1 H2AX MLKL GSDMD CDKN1A	An H&E image patch of debris
WSSS4LUAD
Tumor	EPCAM EGFR KRAS ALK TP53 MET BRAF ROS1 STK11 KRT18 KRT8 KRT19 KEAP1 MYO6 TP53BP2 PLA2G2A CLDN7 TJP1 PKP3 DSP	An H&E image patch of tumor tissue
Normal	SFTPC SFTPB SFTPA1 ACE2 TUBA1A TUBB TTF1 MUC5AC MUC5B SPDEF ABCA3 FOXJ1 AQP5 CFTR KRT5 KRT14 CNN1 TAGLN TPM2 MYLK MYH11 TPM1 TNC ACTG2 CALD1	An H&E image patch of normal tissue
LC25000
Tumor	FGFR1 EPCAM EGFR KRAS ALK TP53 TP63 BIRC5 CCND1 SCCA MET BRAF ROS1 STK11 KRT18 KRT8 KRT19 KEAP1 MYO6 TP53BP2 PLA2G2A CLDN7 TJP1 PKP3 DSP	An H&E image patch of cancer tissue
benign	SFTPC SFTPB SFTPA1 ACE2 TUBA1A TUBB TTF1 MUC5AC MUC5B SPDEF ABCA3 FOXJ1 AQP5 CFTR KRT5 KRT14 CNN1 TAGLN TPM2 MYLK MYH11 TPM1 TNC ACTG2 CALD1	An H&E image patch of benign tissue
PCam
Tumor	TP53 EPCAM CD44 CXCR4 CTLA4 S100A4 MMP9 MMP2 KRT18 KRT8 CDH1 KRAS TP53BP2 MYO6 CLDN7 TJP1 PKP3 CK20 DSP	An H&E image patch of tumor tissue
Normal	CD19 CD3D CD4 CD8A CD20 CXCL13 CCL19 CCL21 S100A9 IL7R B2M LYZ IGHM IGLC LAG3 TCR IL2 PDCD1 FOXP3 PTPRC RAG1 TRBC2 IL2RA IL4 CCL5	An H&E image patch of normal tissue

## Sheet: Supplementary_Table_4
Dataset	Paper	doi
Validation brain dataset	Transcriptome-scale spatial gene expression in the human dorsolateral prefrontal cortex	https://doi.org/10.1038/s41593-020-00787-0
Validation heart dataset	Spatial multi-omic map of human myocardial infarction	https://doi.org/10.1038/s41586-022-05060-x
Validation kideny dataset	Mapping single-cell transcriptomes in the intra-tumoral and associated territories of kidney cancer	https://doi.org/10.1016/j.ccell.2022.11.001
Validation breast dataset	Identification and characterization of a proliferative cell population in estrogen receptor-positive metastatic breast cancer through spatial and single-cell transcriptomics	https://doi.org/10.1101/2023.01.31.526403
Test dataset	Single-cell multiomics profiling reveals heterogeneous transcriptional programs and microenvironment in DSRCTs	https://doi.org/10.1016/j.xcrm.2024.101582
	No publication	https://www.ncbi.nlm.nih.gov/geo/query/acc.cgi?acc=GSE267401
	Bioengineered vascular grafts with a pathogenic TGFBR1 variant model aneurysm formation in vivo and reveal underlying collagen defects	https://doi.org/10.1126/scitranslmed.adg6298
	Integrating single‐cell and spatial analysis reveals MUC1‐mediated cellular crosstalk in mucinous colorectal adenocarcinoma	https://doi.org/10.1002/ctm2.1701
